# Supplementary material for: Newborn blood DNA epigenetic variations and signaling pathway genes associated with Tetralogy of Fallot (TOF)
Source: PubMed Central journal article supplement (PMC6136787; doi:10.1371/journal.pone.0203893), 2018-09-13

|    | Target ID  | position | correlation coefficient | p value    | q value    | exp mean  | meth mean |
|----|------------|----------|-------------------------|------------|------------|-----------|-----------|
| 1  | cg02645710 | 85430085 | -0.188168               | 0.01877    | 0.005184   | 3.3067569 | 0.267062  |
| 2  | cg23680282 | 85430336 | -0.2844                 | 0.02063    | 0.002832   | 0.8488    | 0.117552  |
| 3  | cg21364560 | 95242555 | -0.294019               | 0.01687    | 0.002729   | 10.634568 | 0.21759   |
| 4  | cg08821669 | 1.21E+08 | -0.1948                 | 0.000799   | 0.0003744  | 11.521848 | 0.021354  |
| 5  | cg17030055 | 24645065 | -0.196519               | 0.01375    | 0.003963   | 5.1615058 | 0.069254  |
| 6  | cg11641791 | 38821429 | -0.394969               | 0.001122   | 0.0003591  | 4.4024256 | 0.135569  |
| 7  | cg02062326 | 75643727 | -0.3113                 | 5.606E-08  | 1.263E-08  | 12.603862 | 0.06726   |
| 8  | cg23274377 | 2.2E+08  | -0.346513               | 0.00858    | 0.0024     | 9.3818711 | 0.038806  |
| 9  | cg18803079 | 64014643 | -0.2201                 | 7.707E-07  | 5.486E-08  | 6.7982044 | 0.74987   |
| 10 | cg13114458 | 75905515 | -0.3169                 | 7.249E-11  | 1.306E-11  | 9.6442085 | 0.04388   |
| 11 | cg01311718 | 2.14E+08 | -0.186945               | 0.00000945 | 5.94E-07   | 7.7274229 | 0.04322   |
| 12 | cg02609279 | 1.82E+08 | -0.456976               | 0          | 0          | 8.189539  | 0.692826  |
| 13 | cg02071276 | 2.24E+08 | -0.2753                 | 5.283E-10  | 5.051E-11  | 10.004486 | 0.068616  |
| 14 | cg18295068 | 1.66E+08 | -0.4428                 | 5.466E-07  | 1.759E-07  | 6.2330279 | 0.101475  |
| 15 | cg15946310 | 1.59E+08 | -0.483                  | 6.689E-07  | 5.514E-07  | 9.945     | 0.018556  |
| 16 | cg09365677 | 2.4E+08  | -0.2185                 | 1.373E-06  | 1.464E-07  | 4.808942  | 0.035882  |
| 17 | cg12092090 | 13617584 | -0.2332                 | 0.0001631  | 0.00001583 | 6.380564  | 0.062255  |
| 18 | cg19533977 | 57719682 | -0.2762                 | 6.976E-08  | 8.195E-09  | 13.36204  | 0.150087  |
| 19 | cg01400516 | 47175936 | -0.458906               | 0.0003817  | 0.0001314  | 8.5733169 | 0.019579  |
| 20 | cg20101489 | 2.24E+08 | -0.179453               | 3.681E-06  | 2.008E-07  | 5.077037  | 0.088753  |
| 21 | cg23134869 | 77593233 | -0.4681                 | 0          | 0          | 5.5618344 | 0.25591   |
| 22 | cg25477497 | 87228808 | -0.699186               | 0          | 0          | 9.461778  | 0.367254  |
| 23 | cg08264335 | 44116782 | -0.393441               | 0.002639   | 0.0009381  | 9.6083289 | 0.052874  |
| 24 | cg12273284 | 12490844 | -0.4832                 | 3.467E-08  | 1.327E-08  | 7.6487782 | 0.126881  |
| 25 | cg26345971 | 85430215 | -0.381154               | 5.775E-10  | 8.988E-11  | 1.9994466 | 0.268673  |
| 26 | cg17616217 | 89744940 | -0.3216                 | 0.00001986 | 5.823E-06  | 9.5973308 | 0.1142    |
| 27 | cg18469624 | 53459998 | -0.1918                 | 0.00003889 | 3.701E-06  | 9.505816  | 0.11861   |
| 28 | cg10558887 | 36919409 | -0.580785               | 0          | 0          | 9.162     | 0.139128  |
| 29 | cg16951385 | 65029115 | -0.184853               | 0.01334    | 0.003867   | 10.148536 | 0.058096  |
| 30 | cg23404012 | 71066865 | -0.2523                 | 1.261E-09  | 1.281E-10  | 8.09469   | 0.046598  |
| 31 | cg03547245 | 55335015 | -0.3859                 | 1.371E-14  | 4.337E-15  | 6.716429  | 0.08912   |
| 32 | cg12129209 | 1.02E+08 | -0.4256                 | 0          | 0          | 11.248696 | 0.059091  |
| 33 | cg04254487 | 1.34E+08 | -0.5187                 | 2.031E-09  | 9.363E-10  | 8.3824493 | 0.212056  |
| 34 | cg08757862 | 38807382 | -0.339227               | 1.85E-19   | 2.194E-20  | 7.227838  | 0.612254  |
| 35 | cg10944144 | 64777807 | -0.285145               | 1.317E-13  | 1.141E-14  | 2.971848  | 0.021102  |
| 36 | cg26401673 | 43431343 | -0.3162                 | 2.53E-13   | 3.317E-14  | 8.9418901 | 0.846658  |
| 37 | cg02558537 | 1.07E+08 | -0.416413               | 0          | 0          | 8.177458  | 0.027635  |
| 38 | cg11378242 | 2.45E+08 | -0.2903                 | 1.73E-16   | 1.529E-17  | 10.08     | 0.017718  |
| 39 | cg19021985 | 22398190 | -0.2973                 | 5.944E-09  | 7.885E-10  | 7.7477895 | 0.779761  |

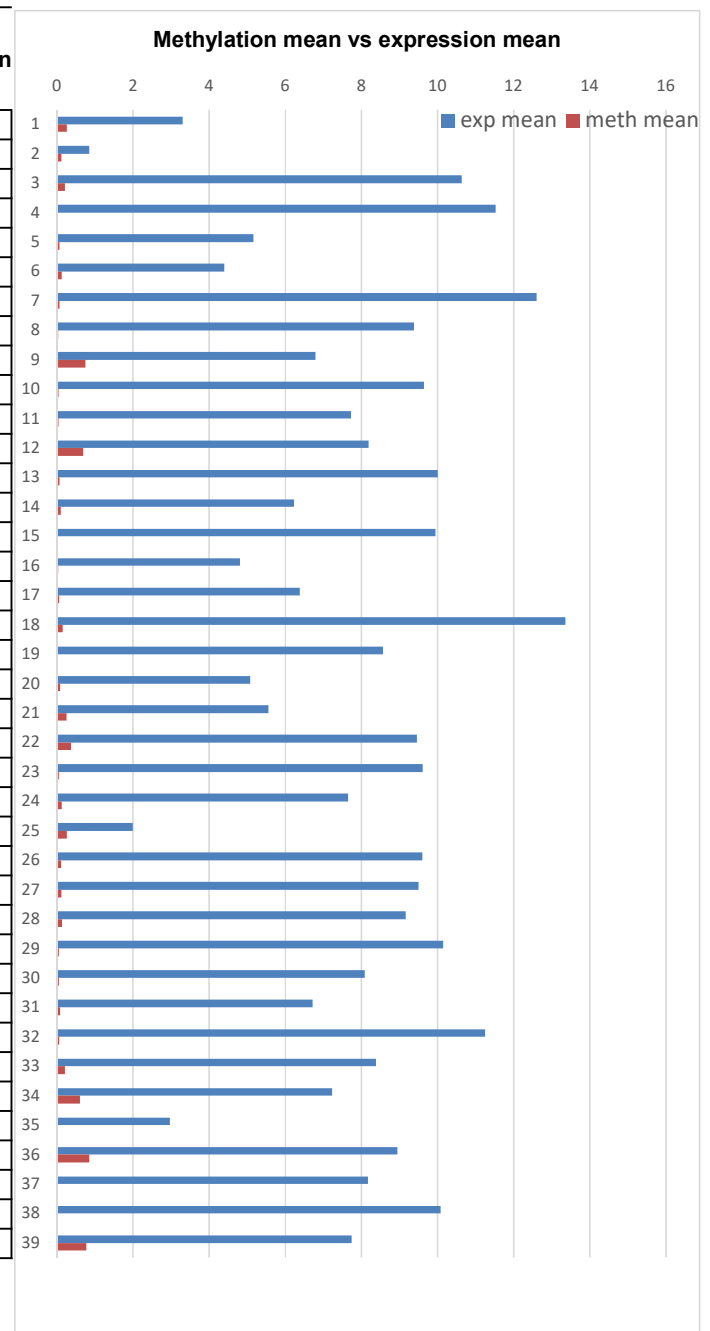

Supplement: pone.0203893.s006.pdf [file pone.0203893.s006.pdf]
