# Supplementary material for: Newborn blood DNA epigenetic variations and signaling pathway genes associated with Tetralogy of Fallot (TOF)
Source: PubMed Central journal article supplement (PMC6136787; doi:10.1371/journal.pone.0203893), 2018-09-13
Supplement: pone.0203893.s005.pdf [file pone.0203893.s005.pdf]

| Target ID     | position  | correlation coefficient | p value     | q value     | exp mean   | meth mean | H3k27Ac  | transcription factors | location           |
|---------------|-----------|-------------------------|-------------|-------------|------------|-----------|----------|-----------------------|--------------------|
| cg27120934    | 129480619 |                         |             |             |            |           | no       | polr2a                | intronic           |
| cg02645710    | 85430085  | -0.1881684              | 0.01877     | 0.005184    | 3.3067569  | 0.267062  | no       | polr2a,sin3a,yy1      | promoter           |
| cg25697769    | 39097335  |                         |             |             |            |           | high     | polr2a,atf2,phf8      | promoter           |
| cg04868078    | 197898229 |                         |             |             |            |           | moderate | gabpa,elf1            | exoniccoding       |
| cg23680282    | 85430336  | -0.2844                 | 0.02063     | 0.002832    | 0.8488     | 0.117552  | high     | polr2a,sin3a,yy1      | first intron       |
| cg24132989    | 88050339  |                         |             |             |            |           | no       | none                  | intronic           |
| cg21364560    | 95242555  | -0.2940194              | 0.01687     | 0.002729    | 10.6345684 | 0.21759   | no       | polr2a,e2h2,ctcf,egr1 | promoter           |
| cg08821669    | 120875978 | -0.1948                 | 0.000799    | 0.0003744   | 11.521848  | 0.021354  | high     | polr,ctcf             | 1stexoncoding      |
| cg14905634    | 73057369  |                         |             |             |            |           | no       | none                  | 1stexonicnoncoding |
| cg17030055    | 24645065  | -0.1965188              | 0.01375     | 0.003963    | 5.1615058  | 0.069254  | no       | polr2a                | 1stexonicnoncoding |
| cg11641791    | 38821429  | -0.3949692              | 0.001122    | 0.0003591   | 4.4024256  | 0.135569  | no       | no                    | promoter           |
| cg17728974    | 105403577 |                         |             |             |            |           | high     | polr2a,sin3a          | promoter           |
| cg11792281    | 26443366  |                         |             |             |            |           | no       | none                  | intronic           |
| cg12414181    | 75287860  |                         |             |             |            |           | no       | polr2a,mx11,znf143    | promoter           |
| cg02062326    | 75643727  | -0.3113                 | 5.606E-08   | 1.263E-08   | 12.6038617 | 0.06726   | high     | polr2a,max,gabpa      | promoter           |
| cg23274377    | 220263237 | -0.3465128              | 0.00858     | 0.0024      | 9.3818711  | 0.038806  | high     | polr,ctcf             | promoter           |
| cg18803079    | 64014643  | -0.2201                 | 7.707E-07   | 5.486E-08   | 6.7982044  | 0.74987   | no       | none                  | promoter           |
| cg13114458    | 75905515  | -0.3169                 | 7.249E-11   | 1.306E-11   | 9.6442085  | 0.04388   | high     | polr2a,gabpa,e2f1     | promoter           |
| cg01311718    | 214015137 | -0.1869449              | 0.00000945  | 0.000000594 | 7.7274229  | 0.04322   | high     | polr2a,znf263         | promoter           |
| cg02609279    | 182325952 | -0.4569764              | 0           | 0           | 8.189539   | 0.692826  | high     | polr2a,gata1          | intronic           |
| cg02071276    | 224303989 | -0.2753                 | 5.283E-10   | 5.051E-11   | 10.0044862 | 0.068616  | no       | ctcf,Rad21            | intronic           |
| cg18295068    | 166060400 | -0.4428                 | 5.466E-07   | 1.759E-07   | 6.2330279  | 0.101475  | no       | ctcf,Rad21,smc3       | 1stexonicnoncoding |
| cg15946310    | 159436034 | -0.483                  | 6.689E-07   | 5.514E-07   | 9.945      | 0.018556  | high     | polr2a,jun,gabpa,elf1 | promoter           |
| cg09365677    | 240061611 | -0.2185                 | 0.000001373 | 1.464E-07   | 4.808942   | 0.035882  | no       | ctcf,Rad21,smc3       | 1stexonicnoncoding |
| ch.11.319992F | 319992    |                         |             |             |            |           | high     | none                  | exonic             |
| cg12092090    | 13617584  | -0.2332                 | 0.0001631   | 0.00001583  | 6.380564   | 0.062255  | no       | none                  | promoter           |
| cg19533977    | 57719682  | -0.2762                 | 6.976E-08   | 8.195E-09   | 13.3620395 | 0.150087  | no       | runx3                 | intronic           |
| cg01400516    | 47175936  | -0.4589059              | 0.0003817   | 0.0001314   | 8.5733169  | 0.019579  | moderate | polr2a,ctcf,gata2     | 1stintron          |
| cg20101489    | 224467074 | -0.1794531              | 0.000003681 | 2.008E-07   | 5.077037   | 0.088753  | moderate | polr2aq,ctcf,sp2      | 1stexonicnoncoding |
| cg23134869    | 77593233  | -0.4681                 | 0           | 0           | 5.5618344  | 0.25591   | high     | polr2a,yy1            | promoter           |
| cg25477497    | 87228808  | -0.6991858              | 0           | 0           | 9.461778   | 0.367254  | no       | foxa1,foxa2           | exonic             |
| cg25947619    | 86233220  |                         |             |             |            |           | moderate | polr2a,spi1           | intronic           |
| cg14534336    | 65028980  |                         |             |             |            |           | high     | polr2a,stat3,taf1     | 1stexonicnoncoding |
| cg07002382    | 44116782  |                         |             |             |            |           | high     | polr2a,cebpb,taf1     | 1stexonicnoncoding |

|               |            |            |            |             |            |          |          |                   |                    |
|---------------|------------|------------|------------|-------------|------------|----------|----------|-------------------|--------------------|
| cg08264335    | 44116782   | -0.3934405 | 0.002639   | 0.0009381   | 9.6083289  | 0.052874 | moderate | none              | exonic             |
| cg12273284    | 12490844   | -0.4832    | 3.467E-08  | 1.327E-08   | 7.6487782  | 0.126881 | no       | none              | intronic           |
| cg26345971    | 85430215   | -0.3811535 | 5.775E-10  | 8.988E-11   | 1.9994466  | 0.268673 | no       | polr2a,sin3a      | intronic           |
| cg10225640    | 121790611  |            |            |             |            |          | high     | polr2a,taf1       | promoter           |
| ch.1.3587792F | 3587792    |            |            |             |            |          | no       | none              | intronic           |
| cg00719685    | 220263698  |            |            |             |            |          | moderate | polr,ctcf         | promoter           |
| cg03814610    | 89744940   |            |            |             |            |          | high     | polr2a,znf263     | promoter           |
| cg17616217    | 89744940   | -0.3216    | 0.00001986 | 0.000005823 | 9.5973308  | 0.1142   | no       | none              | intergenic         |
| cg19579903    | 30583082   |            |            |             |            |          | high     | polr2a,yy1,taf1   | intronic           |
| cg18469624    | 53459998   | -0.1918    | 0.00003889 | 0.000003701 | 9.505816   | 0.11861  | high     | polr2a,etf1,max   | promoter           |
| cg10558887    | 36919409   | -0.5807849 | 0          | 0           | 9.162      | 0.139128 | high     | none              | 1stintronic        |
| cg16951385    | 65029115   | -0.1848534 | 0.01334    | 0.003867    | 10.1485358 | 0.058096 | high     | polr2a,stat3,taf1 | promoter           |
| cg23404012    | 71066865   | -0.2523    | 1.261E-09  | 1.281E-10   | 8.09469    | 0.046598 | high     | none              | intronic           |
| cg03547245    | 55335015   | -0.3859    | 1.371E-14  | 4.337E-15   | 6.716429   | 0.08912  | moderate | max,ctcf          | intronic           |
| cg12129209    | 102276033  | -0.4256    | 0          | 0           | 11.248696  | 0.059091 | high     | polr2a,txf1       | promoter           |
| cg03846926    | 21807211   |            |            |             |            |          | moderate | taf1,cebpb        | 1stexonicnoncoding |
| cg26800788    | 63649371   |            |            |             |            |          | no       | none              | promoter5          |
| cg04254487    | 134304883  | -0.5187    | 2.031E-09  | 9.363E-10   | 8.3824493  | 0.212056 | moderate | ctcf,tebbp        | intronic           |
| cg08757862    | 38807382   | -0.3392271 | 1.85E-19   | 2.194E-20   | 7.227838   | 0.612254 | moderate | polr2a,ctcf,ikzf1 | promoter           |
| cg10944144    | 64777807   | -0.2851448 | 1.317E-13  | 1.141E-14   | 2.971848   | 0.021102 | high     | polr2a,myc,atf2   | promoter           |
| cg02981003    | 134965914  |            |            |             |            |          | no       | none              | promoter           |
| cg26401673    | 43431343   | -0.3162    | 2.53E-13   | 3.317E-14   | 8.9418901  | 0.846658 | high     | polr2a,gata2,fos  | intronic           |
| ch.2.800013F  | 800013     |            |            |             |            |          | no       | none              | intronic           |
| cg19781109    | 91244526   |            |            |             |            |          | no       | none              | intronic           |
| cg06237608    | 91244584   |            |            |             |            |          | no       | none              | promoter5          |
| cg25510609    | 86233236   |            |            |             |            |          | high     | polr2a,spi1,max   | intronic           |
| cg02558537    | 107328586  | -0.4164131 | 0          | 0           | 8.177458   | 0.027635 | high     | polr2a,yy1,e2f1   | promoter           |
| cg11378242    | 244999800  | -0.2903    | 1.73E-16   | 1.529E-17   | 10.08      | 0.017718 | high     | polr2a            | 1stintronic        |
| cg17485454    | 87,281,281 |            |            |             |            |          | no       | polr2a,yy1,spi1   | 1stexonicnoncoding |
| cg04838988    | 70984437   |            |            |             |            |          | no       | e2h2,rbbp5        | promoter           |
| cg27509202    | 35484972   |            |            |             |            |          | high     | polr2a,jun,fos    | 1stexonicnoncoding |
| cg19021985    | 22398190   | -0.2973    | 5.944E-09  | 7.885E-10   | 7.7477895  | 0.779761 | moderate | polr2a,SPI1       | 1stexonicnoncoding |
| cg00994804    | 36259383   |            |            |             |            |          | high     | polr2a,rbb5       | exoniccoding       |
| ch.1.659794R  | 659794     |            |            |             |            |          | moderate | none              | promoter           |
| cg22664298    | 29680347   |            |            |             |            |          | no       | none              | intergenic         |
